# Supplementary material for: Product Ion Distributions using H 3 O + PTR-ToF-MS: Mechanisms, Transmission Effects, and Instrument-to-Instrument Variability
Source: Copernicus journal article supplement (doi:10.5194/egusphere-2024-3132), 2024-10-14
Supplement: Supplementary file 1 [file egusphere-2024-3132-supplement.zip]

## Sheet: ReadMe
H3O+ Ionization Product Ion Distribution (PID) Library
Version Log
V1	Includes data from seven laboratories, all Vocus instruments
User Community Input
Users wishing to submit data to this library can email Michael Link (michael.f.link@nist.gov) and a link to submit a data file will be provided in a follow-up email.
You will be asked to submit a chromatogram of a sample measurement from a standard calibration cylinder in the form of an unprocessed .h5 file.
Additionally, please provide the informtion corresponding to columns B through P in the "2_Lab_ID" spreadsheet.
Data submitted by users will remain anonymized in updated versions of the H3O+ PID library and follow the "Lab#" identifier formatting.
What's In This Library?
As outlined in our manuscript "Product Ion Distributions using H3O+ PTR-ToF-MS: Mechanisms, Transmission Effects, and Instrument-to-Instrument Variability" unintended product ions can form when measuring VOCs using H3O+ ionization PTR-MS.
This library contains measurements of PIDs from VOCs as determined from GC-PTR-ToF-MS measurements.
When referencing this library please reference our manuscript to be determined
Disclaimer
Certain equipment, instruments, or materials, commercial or non-commercial, are identified in this paper in to specify the experimental procedure adequately.
Such identification is not intended to imply recommendation or endorsement of any product or service by NIST, nor is it intended to imply that the materials or equipment identified are necessarily the best available for the purpose.
How to Use This Library
There are three tabs for user interaction in this spreadsheet.
1_PID_Main: The PID_Main tab contains rows of VOCs.
That spreadsheet is seperated columns differentiated by color and are described below.
2_Lab_ID: This sheet contains instrument configurations and data collection dates corresponding to the "Lab" column label in the 1_PID_Main sheet.
3_EN_Calculator: A calculator for E/N. This calculator does not incorperate additional energy from the RF-only quadrupole on the IMR of Vocus instruments in the E/N calculation.
1_PID_Main blue shading: These columns are laboratory identifier, VOC property, and measurement details
Column label	Description
Lab	Which laboratory the measurement came from. The details of instrument configurations for the laboratory ID are shown in the "Lab_ID" tab.
Species	chemical name
funtionality 1 (arbitrary assignment)	functional group 1
funtionality 2 (arbitrary assignment)	functional group 2
source	chemical source; cylinder = multi-component VOC standard cylinder, liquid = evaporated liquid source, ambient = ambient air sample
1_PID_Main green shading: These columns are elemental formula and m/Q correpsonding to measured product ions elemental formula are seperated from m/Q with ";" (e.g., H3O+;19.01)
Ion m/Q are in units of Thompson (1 Th approximately equal to 1.036 x 10^-8 kg C^-1)
Product ion definitions are shown in the label below.
PID label	Product ion mechanism
MH+	H+ adduct
[MH·H2O]+	single water cluster
[MH·(H2O)2]+	double water cluster
M+	charge transfer
[M-H]+	hydride transfer
[MH-H2O]+	dehydration
Fn	fragment (n=1,2,3,etc.)
other	unknown mechanism
1_PID_Main pink shading: These columns are the product ion contributions correpsonding to measured product ions
The product ion elemental formula and m/Q that appears in the green columns for a VOC will have a number between 0 and 1 at the corresponding product ion in these columns.
The sum of each product ion contribution will add up to 1 and thus the entries in these columns represent the fraction of signal attributable to a product ion generated from a VOC.

## Sheet: 1_PID_Main
Lab	Species	funtionality 1	funtionality 2	source	MH+	[MH·H2O]+	[MH·(H2O)2]+	M+	[M-H]+	[MH-H2O]+	F1	F2	F3	F4	F5	other	MH+	[MH·H2O]+	[MH·(H2O)2]+	M+	[M-H]+	[MH-H2O]+	F1	F2	F3	F4	F5	other
Lab1b	acetaldehyde	aldehyde		Liquid	C2H5O+;45.033	C2H7O2+;63.044											0.75	0.25
Lab1b	methanol	alcohol		Liquid	CH5O+;33.033	CH7O2+;51.044	CH9O3+;69.055										0.01	0.91	0.08
Lab1b	propanal	aldehyde		Liquid	C3H7O+;59.049	C3H9O2+;77.06		C3H6O+;58.041	C3H5O+;57.033								0.31	0.45		0.03	0.21
Lab1b	ethanol	alcohol		Liquid	C2H7O+;47.049	C2H9O2+;65.06	C2H11O3+;83.07		C2H5O+;45.033								0.48	0.46	0.02		0.04
Lab1b	methyl acetate	ester		Liquid	C3H7O2+;75.044	C3H9O3+;93.055					C2H5O2+;61.028	C2H3O+;43.018					0.9	0.06					0.02	0.02
Lab1b	propanol	alcohol		Liquid	C3H9O+;61.065	C3H11O2+;79.075	C3H13O3+;97.086		C3H7O+;59.049	C3H7+;43.054	C3H5+;41.039					C3H9O2+;77.06	0.06	0.38	0.04		0.28	0.13	0.05					0.06
Lab1b	ethyl acetate	ester		Liquid	C4H9O2+;89.06	C4H11O3+;107.07					C2H3O+;43.018	C2H5O2+;61.028				C2H7O3+;79.039	0.52	0.07					0.05	0.31				0.05
Lab1b	butanol	alcohol		Liquid		C4H13O2+;93.091				C4H9+;57.07								0.05				0.95
Lab1b	2-butanone	ketone		Liquid	C4H9O+;73.065	C4H11O2+;91.075											0.88	0.12
Lab1b	pentanal	aldehyde		Liquid	C5H11O+;87.08	C5H13O2+;105.09				C5H9+;69.07	C3H5O+;57.033	C3H7O+;59.049					0.1	0.22				0.61	0.04	0.03
Lab1b	2,3-butadione	ketone		Liquid	C4H7O2+;87.044	C4H9O3+;105.05	C4H11O4+;123.07				C3H7O+;59.049						0.73	0.12	0.03				0.12
Lab1b	octanal	aldehyde		Liquid	C8H17O+;129.13	C8H19O2+;147.14			C8H15O+;127.11	C8H15+;111.12	C5H9+;69.07	C3H5+;41.039					0.34	0.17			0.02	0.25	0.19	0.03
Lab1b	butanal	aldehyde		Liquid	C4H9O+;73.065	C4H11O2+;91.075		C4H8O+;72.057	C4H7O+;71.049		C4H5+;53.039	C3H5O+;57.033					0.49	0.4		0.02	0.02		0.03	0.04
Lab1b	linalool	alkene	alcohol	Liquid	C10H19O+;155.14						C10H17+;137.13	C6H9+;81.07	C3H7O+;59.049	C7H11+;95.086			0.03						0.48	0.42	0.04	0.03
Lab1b	6-methyl-5-heptene-2-one	ketone	alkene	Liquid	C8H15O+;127.11					C8H13+;109.1	C8H12+;108.09						0.52					0.44	0.04
Lab1b	formic acid	acid		Liquid	CH3O2+;47.013	CH5O3+;65.023											0.47	0.53
Lab1b	acetic acid	acid		Liquid	C2H5O2+;61.028	C2H7O3+;79.039				C2H3O+;43.018							0.4	0.13				0.47
Lab1b	propanoic acid	acid		Liquid	C3H7O2+;75.044	C3H9O3+;93.055		C3H6O2+;74.036		C3H5O+;57.033							0.57	0.12		0.04		0.27
Lab1b	butanoic acid	acid		Liquid	C4H9O2+;89.06	C4H11O3+;107.07				C4H7O+;71.049	C3H5+;41.039	C3H7+;43.054	C2H4O2+;60.021				0.45	0.1				0.19	0.06	0.17	0.03
Lab1b	acetonitrile	nitrile		Cylinder	C2H4N+;42.034	C2H6NO+;60.044											0.74	0.26
Lab1b	pentanoic acid	acid		Liquid	C5H11O2+;103.08	C5H13O3+;121.09				C5H9O+;85.065	C4H9+;57.07	C2H4O2+;60.021	C3H5+;41.039				0.33	0.1				0.19	0.33	0.03	0.02
Lab1b	unidentified monoterpene acetate ester	ester	alkene	Ambient	C12H21O2+;197.15						C10H17+;137.13	C6H9+;81.07	C2H5O+;45.033	C3H7O+;59.049	C2H7O2+;63.044		0.01						0.14	0.14	0.48	0.06	0.17
Lab1a	heptanal	aldehyde		Cylinder	C7H15O+;115.11	C7H17O2+;133.12			C7H13O+;113.1	C7H13+;97.101	C5H9+;69.07						0.15	0.2			0.02	0.6	0.03
Lab1a	hexanal	aldehyde		Cylinder	C6H13O+;101.1	C6H15O2+;119.11			C6H11O+;99.08	C6H11+;83.086	C3H5O+;57.033						0.08	0.68			0.01	0.22	0.01
Lab1a	cyclohexene	alkene		Cylinder	C6H11+;83.086			C6H10+;82.078	C6H9+;81.07		C4H5+;53.039	C5H7+;67.054					0.78			0.03	0.03		0.01	0.15
Lab1a	hydroxyacetone	ketone	alcohol	Cylinder	C3H7O2+;75.044	C3H9O3+;93.055				C3H5O+;57.033							0.9	0.02				0.08
Lab1a	tetrahydrofuran	heterocycle		Cylinder	C4H9O+;73.065	C4H11O2+;91.075			C4H7O+;71.049	C4H5+;53.039							0.43	0.47			0.07	0.03
Lab1a	methacrolein	aldehyde	alkene	Cylinder	C4H7O+;71.049	C4H9O2+;89.06											0.61	0.39
Lab1a	nitromethane	nitro		Cylinder	CH4NO2+;62.024	CH6NO3+;80.034											0.93	0.07
Lab1a	dimethylsulfide	sulfide		Cylinder	C2H7S+;63.026	C2H6S+;62.018											0.96	0.04
Lab1a	acrylonitrile	nitrile	alkene	Cylinder	C3H4N+;54.034	C3H6NO+;72.044											0.9	0.1
Lab1a	acetone	ketone		Cylinder	C3H7O+;59.049	C3H9O2+;77.06											0.9	0.1
Lab1a	citral	aldehyde	alkene	Cylinder						C10H15+;135.12	C7H9+;93.07	C8H11+;107.09	C7H7+;91.054	C9H11+;119.09								0.38	0.39	0.06	0.08	0.09
Lab1a	styrene	aromatic	alkene	Cylinder	C8H9+;105.07			C8H8+;104.06									0.87			0.13
Lab1a	o-xylene	aromatic		Cylinder	C8H11+;107.09			C8H10+;106.08			C7H7+;91.054						0.81			0.11			0.08
Lab1a	chlorobenzene	aromatic	halogen	Cylinder	C6ClH6+;113.02			C6ClH5+;112.01								C6H7O+;95.049	0.68			0.23								0.09
Lab1a	benzene	aromatic		Cylinder	C6H7+;79.054			C6H6+;78.046								C6H7O+;95.049	0.74			0.2								0.06
Lab1a	D5	siloxane	cyclic	Cylinder	C10H31O5Si5+;371.1						C9H27O5Si5+;355.07						0.96						0.04
Lab1a	nonanal	aldehyde		Cylinder	C9H19O+;143.14	C9H21O2+;161.15	C9H23O3+;179.16	C9H17+;125.13	C6H11+;83.086	C5H9+;69.07							0.3	0.3				0.1	0.11	0.19
Lab1a	pyrolle	heterocycle	alkene	Cylinder	C4H6N+;68.049												1
Lab1a	2-pentanone	ketone		Cylinder	C5H11O+;87.08	C5H13O2+;105.09				C5H9+;69.07	C2H5O+;45.033						0.64	0.32				0.02	0.02
Lab1a	2-octanone	ketone		Cylinder	C8H17O+;129.13	C8H19O2+;147.14					C9H13+;121.1	C5H9+;69.07					0.69	0.25					0.04	0.02
Lab1a	butanal	aldehyde		Cylinder	C4H9O+;73.065	C4H11O2+;91.075			C4H7+;55.054								0.12	0.33				0.55
Lab1a	isoprene	alkene		Cylinder	C5H9+;69.07			C5H8+;68.062	C5H7+;67.054								0.84			0.06	0.1
Lab1a	1,1-dichloroethane	halogen		Cylinder							C2H3Cl+;61.992												1
Lab1a	1,3-hexachlorobutadiene	halogen	alkene	Cylinder	C4HCl6+;258.82			C4Cl6+;257.81									0.43			0.57
Lab1a	1,2-dichlorobenzene	aromatic	halogen	Cylinder	C6Cl2H5+;146.98			C6H4Cl2+;145.97									0.65			0.35
Lab1a	1,3-dichlorobenzene	aromatic	halogen	Cylinder	C6Cl2H5+;146.98			C6H4Cl2+;145.97								C6ClH6O+;129.01	0.73			0.24								0.03
Lab1a	camphene	cyclic	alkene	Cylinder	C10H17+;137.13			C10H16+;136.12			C6H9+;81.07	C9H13+;121.1	C7H9+;93.07	C7H11+;95.086	C6H7+;79.054		0.51			0.02			0.35	0.04	0.04	0.03	0.01
Lab1a	b-pinene	cyclic	alkene	Cylinder	C10H17+;137.13			C10H16+;136.12			C6H9+;81.07	C7H9+;93.07	C7H11+;95.086	C6H7+;79.054			0.47			0.02			0.4	0.06	0.03	0.02
Lab1a	a-terpinene	cyclic	alkene	Cylinder	C10H17+;137.13			C10H16+;136.12			C6H9+;81.07	C9H13+;121.1	C7H9+;93.07	C7H11+;95.086	C6H7+;79.054		0.48			0.07			0.34	0.05	0.03	0.02	0.01
Lab1a	p-cymene	cyclic	alkene	Cylinder	C10H15+;135.12			C10H14+;134.11			C7H9+;93.07	C9H11+;119.09	C7H7+;91.054				0.21			0.04			0.55	0.14	0.06
Lab1a	a-pinene	cyclic	alkene	Cylinder	C10H17+;137.13						C7H7+;91.054	C6H9+;81.07	C7H9+;93.07	C7H11+;95.086	C6H7+;79.054		0.47						0.03	0.38	0.07	0.03	0.02
Lab1a	delta-3-carene	cyclic	alkene	Cylinder	C10H17+;137.13						C6H9+;81.07	C7H9+;93.07	C7H11+;95.086	C6H7+;79.054	C7H8+;92.062		0.54						0.33	0.05	0.03	0.03	0.02
Lab1a	limonene	cyclic	alkene	Cylinder	C10H17+;137.13						C6H9+;81.07	C7H11+;95.086	C6H7+;79.054				0.45						0.44	0.07	0.04
Lab1b	1,8-cineole	cyclic	alcohol	Cylinder	C10H19O+;155.14					C10H17+;137.13	C6H9+;81.07	C7H11+;95.086					0.06					0.53	0.39	0.02
Lab1a	trichloroethylene	halogen	alkene	Cylinder				C2HCl3+;129.91												1
Lab1a	carbontetrachloride	halogen		Cylinder							CCl3+;116.91												1
Lab1a	toluene	aromatic		Cylinder	C7H9+;93.07			C7H8+;92.062	C7H7+;91.054							C6H7O+;95.049	0.73			0.1	0.13							0.04
Lab1a	tetrachloroethylene	halogen	alkene	Cylinder				C2Cl4+;163.87												1
Lab1a	1,4-dichlorobenzene	aromatic	halogen	Cylinder	C6Cl2H5+;146.98			C6H4Cl2+;145.97							C6ClH6O+;129.01		0.65			0.34								0.01
Lab1a	trichlorofluoromethane	halogen		Cylinder							CCl3+;116.91	CFCl2+;100.94											0.61	0.39
Lab1a	vinyl chloride	halogen	alkene	Cylinder				C2H3Cl+;61.992												1
Lab1a	ethyl benzene	aromatic		Cylinder	C8H11+;107.09			C8H10+;106.08			C7H7+;91.054	C6H7+;79.054					0.47			0.07			0.1	0.36
Lab1a	methylcyclopentanone	cyclic	ketone	Liquid	C6H9O+;97.065	C6H11O2+;115.08											0.91	0.09
Lab1a	cyclopentanone	cyclic	ketone	Liquid	C5H7O+;83.049	C5H9O2+;101.06		C5H6O+;82.041									0.88	0.09		0.03
Lab1a	propylene glycol	alcohol		Liquid	C3H9O2+;77.06	C3H11O3+;95.07			C3H7O2+;75.044	C3H7O+;59.049							0.32	0.04			0.1	0.54
Lab1a	2-hexanone	ketone		Liquid	C6H13O+;101.1	C6H15O2+;119.11				C6H11+;83.086							0.52	0.4				0.08
Lab1a	acetonitrile	nitrile		Cylinder	C2H4N+;42.034	C2H6NO+;60.044											0.4	0.6
Lab1a	2-butanone	ketone		Cylinder	C4H9O+;73.065	C4H11O2+;91.075				C4H7+;55.054							0.81	0.15				0.04
Lab2a	ethyl acetate	ester		Cylinder	C4H9O2+;89.06	C4H11O3+;107.07					C2H3O+;43.018	C2H5O2+;61.028				C2H7O3+;79.039	0.43	0.11					0.38	0.04				0.04
Lab2a	vinyl acetate	ester	alkene	Cylinder	C4H7O2+;87.044	C4H9O3+;105.05					C2H3O+;43.018	C2H5O2+;61.028				C2H7O3+;79.039	0.26	0.05					0.19	0.41				0.09
Lab2a	acetone	ketone		Cylinder	C3H7O+;59.049	C3H9O2+;77.06											0.95	0.05
Lab2a	1,2,4-trichlorobenzene	aromatic	halogen	Cylinder	C6H4Cl3+;180.94			C6H3Cl3+;179.93									0.4			0.6
Lab2a	1,2,4-trimethylbenzene	aromatic		Cylinder	C9H13+;121.1			C9H12+;120.09	C9H11+;119.09		C8H9+;105.07						0.89			0.06	0.01		0.04
Lab2a	1,2-dichlorobenzene	aromatic	halogen	Cylinder	C6H5Cl2+;146.98			C6H4Cl2+;145.97									0.6			0.4
Lab2a	1,3,5-trimethylbenzene	aromatic		Cylinder	C9H13+;121.1			C9H12+;120.09	C9H11+;119.09		C8H9+;105.07						0.91			0.04	0.02		0.03
Lab2a	1,3-dichlorobenzene	aromatic	halogen	Cylinder	C6H5Cl2+;146.98			C6H4Cl2+;145.97									0.79			0.21
Lab2a	1,4-dichlorobenzene	aromatic	halogen	Cylinder	C6H5Cl2+;146.98			C6H4Cl2+;145.97									0.65			0.35
Lab2a	chlorobenzene	aromatic	halogen	Cylinder	C6ClH6+;113.02			C6ClH5+;112.01								C6H7O+;95.049	0.71			0.21								0.08
Lab2a	ethyl benzene	aromatic		Cylinder	C8H11+;107.09			C8H10+;106.08			C7H7+;91.054	C6H7+;79.054					0.57			0.04			0.08	0.31
Lab2a	benzene	aromatic		Cylinder	C6H7+;79.054			C6H6+;78.046								C6H7O+;95.049	0.73			0.16								0.11
Lab2a	benzyl chloride	aromatic	halogen	Cylinder	C7H7+;91.054												1
Lab2a	1,3-hexachlorobutadiene	alkene	halogen	Cylinder	C4HCl6+;258.82			C4Cl6+;257.81									0.61			0.39
Lab2a	2-butanone	ketone		Cylinder	C4H9O+;73.065	C4H11O2+;91.075											0.91	0.09
Lab2a	carbon disulfide	sulfide		Cylinder	CS2+;75.944												1
Lab2a	1,4-dioxane	heterocycle		Cylinder	C4H9O2+;89.06	C4H11O3+;107.07			C4H7O2+;87.044		C2H5O+;45.033						0.43	0.47			0.02		0.08
Lab2a	1,1,1-trichloroethane	halogen		Cylinder	C2H3Cl2+;96.961												1
Lab2a	1,1,2,2-tetrachloroethane	halogen		Cylinder							C2HCl3+;129.91	CHCl2+;82.945											0.1	0.9
Lab2a	1,2-dibromomethane	halogen		Cylinder							C2H4Br+;106.95												1
Lab2a	1,2-dichloroethane	halogen		Cylinder							C2H3Cl+;61.992												1
Lab2a	ethanol	alcohol		Cylinder	C2H7O+;47.049	C2H9O2+;65.06	C2H11O3+;83.07										0.54	0.44	0.02
Lab2a	1,1-dichloroethylene	halogen	alkene	Cylinder	C2H3Cl2+;96.961			C2H2Cl2+;95.953									0.83			0.17
Lab2a	cis-1,1-dichloroethylene	halogen	alkene	Cylinder	C2H3Cl2+;96.961			C2H2Cl2+;95.953									0.04			0.96
Lab2a	trans-1,2-dichloroethylene	halogen	alkene	Cylinder				C2H2Cl2+;95.953												1
Lab2a	tetrachloroethylene	halogen	alkene	Cylinder				C2Cl4+;163.87												1
Lab2a	trichloroethylene	halogen	alkene	Cylinder				C2HCl3+;129.91												1
Lab2a	furan	heterocycle	alkene	Cylinder	C4H9O+;73.065	C4H11O2+;91.075			C4H7O+;71.049								0.8	0.17			0.03
Lab2a	2-hexanone	ketone		Cylinder	C6H13O+;101.1	C6H15O2+;119.11				C6H11+;83.086							0.71	0.25				0.04
Lab2a	bromodichloromethane	halogen		Cylinder							CHClBr+;126.89	CHCl2+;82.945											0.6	0.4
Lab2a	dibromochloromethane	halogen		Cylinder							CHClBr+;126.89	CHBr2+;170.84											0.73	0.27
Lab2a	carbontetrachloride	halogen		Cylinder							CCl3+;116.91												1
Lab2a	tribromomethane	halogen		Cylinder							CHBr2+;170.84												1
Lab2a	trichlorofluoromethane	halogen		Cylinder							CCl3+;116.91	CFCl2+;100.94											0.73	0.27
Lab2a	trichloromethane	halogen		Cylinder							CCl3+;116.91	CHCl2+;82.945											0.01	0.99
Lab2a	2-methylpentan-4-one	ketone		Cylinder	C6H13O+;101.1	C6H15O2+;119.11				C6H11+;83.086	C4H9+;57.07	C3H7O+;59.049					0.66	0.2				0.02	0.08	0.04
Lab2a	2-propanol	alcohol		Cylinder	C3H9O+;61.065	C3H11O2+;79.075			C3H7O+;59.049	C3H7+;43.054							0.11	0.33			0.35	0.21
Lab2a	cis-1,3-dichloropropene	halogen	alkene	Cylinder							C3H4Cl+;75												1
Lab2a	trans-1,3-dichloropropene	halogen	alkene	Cylinder							C3H4Cl+;75												1
Lab2a	styrene	aromatic	alkene	Cylinder	C8H9+;105.07			C8H8+;104.06	C8H7+;103.05								0.9			0.08	0.02
Lab2a	4-ethyltoluene	aromatic		Cylinder	C9H13+;121.1			C9H12+;120.09			C7H9+;93.07	C7H7+;91.054	C8H9+;105.07			C6H7O+;95.049	0.62			0.02			0.21	0.07	0.03			0.05
Lab2a	toluene	aromatic		Cylinder	C7H9+;93.07			C7H8+;92.062	C7H7+;91.054							C6H7O+;95.049	0.75			0.07	0.11							0.07
Lab2a	o-xylene	aromatic		Cylinder	C8H11+;107.09			C8H10+;106.08			C7H7+;91.054						0.86			0.04			0.1
Lab2b	ethanol	alcohol		Cylinder	C2H7O+;47.049	C2H9O2+;65.06			C2H5O+;45.033								0.59	0.39			0.02
Lab2b	acetonitrile	nitrile		Cylinder	C2H4N+;42.034	C2H6NO+;60.044											0.76	0.24
Lab2b	acetone	ketone		Cylinder	C3H7O+;59.049	C3H9O2+;77.06											0.98	0.02
Lab2b	acrylonitrile	nitrile	alkene	Cylinder	C3H4N+;54.034	C3H6NO+;72.044											0.91	0.09
Lab2b	isoprene	alkene		Cylinder	C5H9+;69.07			C5H8+;68.062	C5H7+;67.054								0.92			0.02	0.06
Lab2b	2-butanone	ketone		Cylinder	C4H9O+;73.065												1
Lab2b	benzene	aromatic		Cylinder	C6H7+;79.054			C6H6+;78.046								C6H7O+;95.049	0.92			0.01								0.07
Lab2b	m-xylene	aromatic		Cylinder	C8H11+;107.09			C8H10+;106.08	C8H9+;105.07		C7H7+;91.054						0.88			0.03	0.02		0.07
Lab2b	a-pinene	cyclic	alkene	Cylinder	C10H17+;137.13						C7H7+;91.054	C6H9+;81.07	C7H9+;93.07	C7H11+;95.086	C6H7+;79.054		0.5						0.01	0.42	0.02	0.03	0.02
Lab2b	1,2,4-trimethylbenzene	aromatic		Cylinder	C9H13+;121.1				C9H11+;119.09		C8H9+;105.07						0.95				0.01		0.04
Lab2b	D3	siloxane		Cylinder	C6H19O3Si3+;223.06	C6H21O4Si3+;241.07											0.96	0.04
Lab2b	D4	siloxane		Cylinder	C8H25O4Si4+;297.08						C7H21O4Si4+;281.05						0.98						0.02
Lab2b	D5	siloxane		Cylinder	C10H31O5Si5+;371.1						C9H27O5Si5+;355.07						0.8						0.2
Lab3a	acetone	ketone		Cylinder	C3H7O+;59.049	C3H9O2+;77.06					C2H3O+;43.018						0.95	0.03					0.02
Lab3a	propanal	aldehyde		Cylinder	C3H7O+;59.049	C3H9O2+;77.06					C2H3O+;43.018						0.91	0.04					0.05
Lab3a	isoprene	alkene		Cylinder	C5H9+;69.07				C5H7+;67.054		C3H5+;41.039	C3H3+;39.023					0.39				0.06		0.28	0.27
Lab3a	methacrolein	aldehyde	alkene	Cylinder	C4H7O+;71.049	C4H9O2+;89.06					C3H7+;43.054	C3H5+;41.039	C3H3+;39.023				0.61	0.08					0.16	0.08	0.07
Lab3a	methyl vinyl ketone	ketone	alkene	Cylinder	C4H7O+;71.049	C4H9O2+;89.06					C2H3O+;43.018						0.78	0.04					0.18
Lab3a	2-methyl-3-buten-2-ol	alcohol	alkene	Cylinder	C5H11O+;87.08	C5H13O2+;105.09				C5H9+;69.07	C3H5+;41.039	C3H3+;39.023					0.1	0.01				0.42	0.26	0.21
Lab3a	ethyl acetate	ester		Cylinder	C4H9O2+;89.06						C2H3O+;43.018	C2H5O2+;61.028				C2H7O3+;79.039	0.11						0.25	0.58				0.06
Lab3a	toluene	aromatic		Cylinder	C7H9+;93.07			C7H8+;92.062	C7H7+;91.054							C6H7O+;95.049	0.67			0.04	0.17							0.12
Lab3a	a-pinene	cyclic	alkene	Cylinder	C10H17+;137.13						C6H9+;81.07	C7H9+;93.07	C7H11+;95.086	C6H7+;79.054			0.32						0.54	0.03	0.07	0.04
Lab3a	b-pinene	cyclic	alkene	Cylinder	C10H17+;137.13			C10H16+;136.12			C6H9+;81.07	C7H9+;93.07	C7H11+;95.086	C6H7+;79.054			0.3						0.56	0.02	0.07	0.05
Lab3a	limonene	cyclic	alkene	Cylinder	C10H17+;137.13						C6H9+;81.07	C7H11+;95.086	C6H7+;79.054				0.26						0.62	0.11	0.01
Lab3a	D5	siloxane		Cylinder	C10H31O5Si5+;371.1						C9H27O5Si5+;355.07						0.83						0.17
Lab3b	ethanol	alcohol		Cylinder	C2H7O+;47.049	C2H9O2+;65.06											0.7	0.3
Lab3b	acetonitrile	nitrile		Cylinder	C2H4N+;42.034	C2H6NO+;60.044											0.97	0.03
Lab3b	acetone	ketone		Cylinder	C3H7O+;59.049	C3H9O2+;77.06					C2H3O+;43.018						0.9	0.07					0.03
Lab3b	acrylonitrile	nitrile	alkene	Cylinder	C3H4N+;54.034	C3H6NO+;72.044											0.91	0.09
Lab3b	isoprene	alkene		Cylinder	C5H9+;69.07			C5H8+;68.062	C5H7+;67.054		C3H5+;41.039	C3H3+;39.023					0.66			0.01	0.06		0.16	0.11
Lab3b	2-butanone	ketone		Cylinder	C4H9O+;73.065	C4H11O2+;91.075											0.82	0.18
Lab3b	methyl vinyl ketone	ketone	alkene	Cylinder	C4H7O+;71.049	C4H9O2+;89.06					C2H3O+;43.018						0.87	0.09					0.04
Lab3b	benzene	aromatic		Cylinder	C6H7+;79.054			C6H6+;78.046								C6H7O+;95.049	0.83			0.11								0.06
Lab3b	m-xylene	aromatic		Cylinder	C8H11+;107.09			C8H10+;106.08	C8H9+;105.07								0.94			0.04	0.02
Lab3b	a-pinene	cyclic	alkene	Cylinder	C10H17+;137.13						C6H9+;81.07	C7H9+;93.07	C7H11+;95.086	C6H7+;79.054			0.42						0.51	0.03	0.03	0.01
Lab3b	1,2,4-trimethylbenzene	aromatic		Cylinder	C9H13+;121.1			C9H12+;120.09	C9H11+;119.09		C8H9+;105.07						0.87			0.07	0.02		0.04
Lab3b	D4	siloxane		Cylinder	C8H25O4Si4+;297.08	C8H27O5Si4+;315.09											0.93	0.07
Lab3b	D5	siloxane		Cylinder	C10H31O5Si5+;371.1						C9H27O5Si5+;355.07						0.79						0.21
Lab4a	acetonitrile	nitrile		Cylinder	C2H4N+;42.034	C2H6NO+;60.044											0.84	0.16
Lab4a	a-pinene	cyclic	alkene	Cylinder	C10H17+;137.13						C6H9+;81.07	C7H9+;93.07	C7H11+;95.086	C6H7+;79.054			0.33						0.57	0.02	0.05	0.03
Lab4a	m-xylene	aromatic		Cylinder	C8H11+;107.09			C8H10+;106.08	C8H9+;105.07								0.94			0.02	0.04
Lab4a	D5	siloxane		Cylinder	C10H31O5Si5+;371.1						C9H27O5Si5+;355.07						0.89						0.11
Lab4b	benzene	aromatic		Cylinder	C6H7+;79.054			C6H6+;78.046								C6H7O+;95.049	0.81			0.08								0.11
Lab4b	acetonitrile	nitrile		Cylinder	C2H4N+;42.034	C2H6NO+;60.044											0.87	0.13
Lab4b	acetone	ketone		Cylinder	C3H7O+;59.049	C3H9O2+;77.06											0.91	0.09
Lab4b	m-xylene	aromatic		Cylinder	C8H11+;107.09			C8H10+;106.08	C8H9+;105.07		C7H7+;91.054						0.82			0.03	0.04		0.11
Lab4b	a-pinene	cyclic	alkene	Cylinder	C10H17+;137.13						C6H9+;81.07	C7H9+;93.07	C7H11+;95.086	C6H7+;79.054			0.36						0.53	0.03	0.05	0.03
Lab5	methanol	alcohol		Cylinder	CH5O+;33.033	CH7O2+;51.044											0.78	0.22
Lab5	acetonitrile	nitrile		Cylinder	C2H4N+;42.034	C2H6NO+;60.044											0.97	0.03
Lab5	acetaldehyde	aldehyde		Cylinder	C2H5O+;45.033	C2H7O2+;63.044											0.95	0.05
Lab5	acetone	ketone		Cylinder	C3H7O+;59.049	C3H9O2+;77.06					C2H3O+;43.018						0.91	0.06					0.03
Lab5	isoprene	alkene		Cylinder	C5H9+;69.07				C5H7+;67.054		C3H5+;41.039						0.8				0.05		0.15
Lab5	benzene	aromatic		Cylinder	C6H7+;79.054			C6H6+;78.046								C6H7O+;95.049	0.87			0.08								0.05
Lab5	toluene	aromatic		Cylinder	C7H9+;93.07			C7H8+;92.062	C7H7+;91.054							C6H7O+;95.049	0.81			0.05	0.05							0.09
Lab5	m-xylene	aromatic		Cylinder	C8H11+;107.09			C8H10+;106.08			C7H7+;91.054						0.89			0.04			0.07
Lab5	1,2,3-trimethylbenzene	aromatic		Cylinder	C9H13+;121.1			C9H12+;120.09			C8H9+;105.07						0.92			0.06			0.02
Lab5	a-pinene	cyclic	alkene	Ambient	C10H17+;137.13						C6H9+;81.07						0.49						0.51
Lab5	ethanol	alcohol		Ambient	C2H7O+;47.049	C2H9O2+;65.06			C2H5O+;45.033								0.57	0.26			0.17
Lab6a	isoprene	alkene		Cylinder	C5H9+;69.07			C5H8+;68.062	C5H7+;67.054		C3H5+;41.039	C3H3+;39.023					0.61			0.08	0.19		0.07	0.05
Lab6a	acetone	ketone		Cylinder	C3H7O+;59.049						C2H3O+;43.018						0.94						0.06
Lab6a	acetonitrile	nitrile		Cylinder	C2H4N+;42.034	C2H6NO+;60.044											0.99	0.01
Lab6a	acrylonitrile	nitrile	alkene	Cylinder	C3H4N+;54.034	C3H6NO+;72.044											0.99	0.01
Lab6a	2-butanone	ketone		Cylinder	C4H9O+;73.065					C4H7+;55.054	C2H3O+;43.018						0.87					0.09	0.04
Lab6a	benzene	aromatic		Cylinder	C6H7+;79.054			C6H6+;78.046								C6H7O+;95.049	0.67			0.28								0.05
Lab6a	toluene	aromatic		Cylinder	C7H9+;93.07			C7H8+;92.062	C7H7+;91.054								0.66			0.22	0.12
Lab6a	m-xylene	aromatic		Cylinder	C8H11+;107.09			C8H10+;106.08	C8H9+;105.07		C7H7+;91.054						0.7			0.18	0.02		0.1
Lab6a	a-pinene	cyclic	alkene	Cylinder	C10H17+;137.13						C6H9+;81.07	C7H9+;93.07	C6H7+;79.054				0.42						0.41	0.15	0.02
Lab6a	1,2,4-trimethylbenzene	aromatic		Cylinder	C9H13+;121.1			C9H12+;120.09	C9H11+;119.09		C8H9+;105.07						0.72			0.2	0.01		0.07
Lab6a	furan	heterocycle		Cylinder	C4H5O+;69.033												1
Lab6a	carbontetrachloride	halogen		Cylinder							CCl3+;116.91												1
Lab6a	t-Amyl Ethyl Ether	ether		Cylinder							C5H11O+;87.08	C5H11+;71.086	C4H9O+;73.065	C3H7O+;59.049	C3H7+;43.054	C6H13O+;101.1							0.11	0.42	0.05	0.22	0.16	0.04
Lab6a	ethylbenzene	aromatic		Cylinder	C8H11+;107.09			C8H10+;106.08			C7H7+;91.054	C6H7+;79.054				C6H7O+;95.049	0.36			0.07			0.2	0.35				0.02
Lab6a	D4	siloxane		Cylinder	C8H25O4Si4+;297.08	C8H27O5Si4+;315.09					C7H21O4Si4+;281.05						0.85	0.01					0.14
Lab6a	1,3,5-trimethylbenzene	aromatic		Cylinder	C9H13+;121.1			C9H12+;120.09	C9H11+;119.09		C8H9+;105.07						0.72			0.21	0.01		0.06
Lab6a	limonene	cyclic	alkene	Cylinder	C10H17+;137.13						C6H9+;81.07	C7H11+;95.086	C6H7+;79.054				0.41						0.49	0.07	0.03
Lab6a	ethanol	alcohol		Cylinder	C2H7O+;47.049	C2H9O2+;65.06			C2H5O+;45.033								0.44	0.05			0.51
Lab6a	acrolein	aldehyde	alkene	Cylinder	C3H5O+;57.033				C3H3O+;55.018								0.95				0.05
Lab6a	dimethylsulfide	sulfide		Cylinder	C2H7S+;63.026						CH3S+;46.995						0.91						0.09
Lab6a	methyl vinyl ketone	ketone	alkene	Cylinder	C4H7O+;71.049						C2H3O+;43.018	C3H3O+;55.018					0.84						0.08	0.08
Lab6a	cyclohexene	cyclic	alkene	Cylinder	C6H11+;83.086						C4H7+;55.054	C5H7+;67.054					0.6						0.19	0.21
Lab6a	D3	siloxane		Cylinder	C6H19O3Si3+;223.06	C6H21O4Si3+;243.05											0.91	0.09
Lab6a	2-hexanone	ketone		Cylinder	C6H13O+;101.1	C6H15O2+;119.11				C6H11+;83.086	C4H7+;55.054	C2H5O+;45.033	C3H6O+;58.041				0.73	0.03				0.09	0.05	0.05	0.05
Lab6a	furfural	heterocycle	aldehyde	Cylinder	C5H5O2+;97.028				C5H3O2+;95.013								0.89				0.11
Lab6a	styrene	aromatic	alkene	Cylinder	C8H9+;105.07						C6H7+;79.054						0.99						0.01
Lab6a	b-pinene	cyclic	alkene	Cylinder	C10H17+;137.13			C10H16+;136.12			C6H9+;81.07	C7H9+;93.07	C7H11+;95.086	C6H7+;79.054	C7H7+;91.054		0.37			0.02			0.39	0.13	0.03	0.03	0.03
Lab6a	benzaldehdye	aromatic	aldehyde	Cylinder	C7H7O+;107.05				C7H5O+;105.03		C6H7+;79.054						0.7				0.18		0.12
Lab6a	o-xylene	aromatic		Cylinder	C8H11+;107.09			C8H10+;106.08			C7H7+;91.054						0.71			0.17			0.12
Lab6a	tetrahydrofuran	heterocycle		Cylinder	C4H9O+;73.065	C4H11O2+;91.075			C4H7O+;71.049	C4H7+;55.054	C3H3+;39.023						0.51	0.01			0.11	0.35	0.02
Lab6a	1,4-dioxane	heterocycle		Cylinder	C4H9O2+;89.06	C4H11O3+;107.07			C4H7O2+;87.044		C2H5O+;45.033						0.65	0.05			0.02		0.28
Lab6a	bromodichloromethane	halogen		Cylinder							CHBrCl+;126.89	CHCl2+;82.945											0.35	0.65
Lab6a	methyl isobutyl ketone	ketone		Cylinder	C6H13O+;101.1	C6H15O2+;119.11					C5H9O+;85.065	C4H9+;57.07	C3H7O+;59.049				0.64	0.03					0.06	0.21	0.06
Lab6a	dibromochloromethane	halogen		Cylinder							CHBr2+;170.84	CHBrCl+;126.89											0.16	0.84
Lab6a	4-ethyltoluene	aromatic		Cylinder	C9H13+;121.1			C9H12+;120.09			C8H9+;105.07	C7H9+;93.07					0.56				0.09		0.17	0.18
Lab6b	isoprene	alkene		Cylinder	C5H9+;69.07			C5H8+;68.062	C5H7+;67.054		C3H5+;41.039	C3H3+;39.023					0.44			0.11	0.32		0.08	0.05
Lab6b	acetone	ketone		Cylinder	C3H7O+;59.049						C2H3O+;43.018						0.88						0.12
Lab6b	acetonitrile	nitrile		Cylinder	C2H4N+;42.034												1
Lab6b	acrylonitrile	nitrile	alkene	Cylinder	C3H4N+;54.034	C3H6NO+;72.044											0.99	0.01
Lab6b	2-butanone	ketone		Cylinder	C4H9O+;73.065	C4H11O2+;91.075				C4H7+;55.054	C2H3O+;43.018						0.82	0.02				0.1	0.06
Lab6b	benzene	aromatic		Cylinder	C6H7+;79.054			C6H6+;78.046								C6H7O+;95.049	0.49			0.46								0.05
Lab6b	toluene	aromatic		Cylinder	C7H9+;93.07			C7H8+;92.062	C7H7+;91.054								0.48			0.33	0.19
Lab6b	m-xylene	aromatic		Cylinder	C8H11+;107.09			C8H10+;106.08	C8H9+;105.07		C7H7+;91.054						0.53			0.28	0.03		0.16
Lab6b	a-pinene	cyclic	alkene	Cylinder	C10H17+;137.13						C6H9+;81.07	C7H9+;93.07	C6H7+;79.054				0.34						0.37	0.26	0.03
Lab6b	1,2,4-trimethylbenzene	aromatic		Cylinder	C9H13+;121.1			C9H12+;120.09	C9H11+;119.09		C8H9+;105.07						0.56			0.31	0.01		0.12
Lab6b	furan	heterocycle		Cylinder	C4H5O+;69.033												1
Lab6b	carbontetrachloride	halogen		Cylinder							CCl3+;116.91												1
Lab6b	t-Amyl Ethyl Ether	ether		Cylinder							C5H11O+;87.08	C5H11+;71.086	C4H9O+;73.065	C3H7O+;59.049	C3H7+;43.054	C6H13O+;101.1							0.14	0.27	0.08	0.35	0.11	0.05
Lab6b	ethylbenzene	aromatic		Cylinder	C8H11+;107.09			C8H10+;106.08			C7H7+;91.054	C6H7+;79.054				C6H7O+;95.049	0.24			0.11			0.36	0.27				0.02
Lab6b	D4	siloxane		Cylinder	C8H25O4Si4+;297.08	C8H27O5Si4+;315.09					C7H21O4Si4+;281.05						0.84	0.02					0.14
Lab6b	1,3,5-trimethylbenzene	aromatic		Cylinder	C9H13+;121.1			C9H12+;120.09	C9H11+;119.09		C8H9+;105.07						0.54			0.33	0.01		0.12
Lab6b	limonene	cyclic	alkene	Cylinder	C10H17+;137.13						C6H9+;81.07	C7H11+;95.086	C6H7+;79.054				0.38						0.48	0.09	0.05
Lab6b	ethanol	alcohol		Cylinder	C2H7O+;47.049				C2H5O+;45.033								0.32				0.68
Lab6b	methyl vinyl ketone	ketone	alkene	Cylinder	C4H7O+;71.049						C3H3O+;55.018						0.82						0.18
Lab6b	D3	siloxane		Cylinder	C6H19O3Si3+;223.06	C6H21O4Si3+;243.05											0.75	0.25
Lab6b	furfural	heterocycle	aldehyde	Cylinder	C5H5O2+;97.028				C5H3O2+;95.013								0.76				0.24
Lab6b	styrene	aromatic	alkene	Cylinder	C8H9+;105.07						C6H7+;79.054						0.99						0.01
Lab6b	b-pinene	cyclic	alkene	Cylinder	C10H17+;137.13			C10H16+;136.12			C6H9+;81.07	C7H9+;93.07	C7H11+;95.086	C6H7+;79.054	C7H7+;91.054		0.29			0.04			0.33	0.22	0.03	0.04	0.05
Lab6b	ethyl acetate	ester		Cylinder	C4H9O2+;89.06						C2H3O+;43.018	C2H5O2+;61.028					0.37						0.15	0.48
Lab6b	benzaldehdye	aromatic	aldehyde	Cylinder	C7H7O+;107.05				C7H5O+;105.03		C6H7+;79.054						0.53				0.34		0.13
Lab7a	acetaldehyde	aldehyde		Cylinder	C2H5O+;45.033	C2H7O2+;63.044			C2H5O+;45.033								0.75	0.24			0.01
Lab7a	limonene	cyclic	alkene	Cylinder	C10H17+;137.13						C6H9+;81.07	C7H11+;95.086	C6H7+;79.054				0.42						0.49	0.07	0.02
Lab7a	acetonitrile	nitrile		Cylinder	C2H4N+;42.034	C2H6NO+;60.044											0.62	0.38
Lab7a	ethanol	alcohol		Cylinder	C2H7O+;47.049	C2H9O2+;65.06	C2H11O3+;83.07										0.4	0.57	0.03
Lab7a	acrolein	aldehyde	alkene	Cylinder	C3H5O+;57.033	C3H7O2+;75.044											0.9	0.1
Lab7a	furan	heterocycle	alkene	Cylinder	C4H5O+;69.033												1
Lab7a	isoprene	alkene		Cylinder	C5H9+;69.07												1
Lab7a	1,4-dioxane	heterocycle		Cylinder	C4H9O2+;89.06	C4H11O3+;107.07			C4H7O2+;87.044		C2H5O+;45.033						0.57	0.36			0.01		0.06
Lab7a	toluene	aromatic		Cylinder	C7H9+;93.07			C7H8+;92.062	C7H7+;91.054							C6H7O+;95.049	0.65			0.02	0.2		0.13
Lab7a	2-hexanone	ketone		Cylinder	C6H13O+;101.1	C6H15O2+;119.11											0.85	0.15
Lab7a	hexanal	aldehyde		Cylinder	C6H13O+;101.1	C6H15O2+;119.11				C6H11+;83.086							0.19	0.21				0.6
Lab7a	D4	siloxane		Cylinder	C8H25O4Si4+;297.08	C8H27O5Si4+;315.09											0.95	0.05
Lab7a	acetone	ketone		Cylinder	C3H7O+;59.049	C3H9O2+;77.06											0.96	0.04
Lab7b	acetaldehyde	aldehyde		Cylinder	C2H5O+;45.033	C2H7O2+;63.044											0.86	0.14
Lab7b	limonene	cyclic	alkene	Cylinder	C10H17+;137.13						C6H9+;81.07	C6H7+;79.054					0.5						0.48	0.02
Lab7b	acetonitrile	nitrile		Cylinder	C2H4N+;42.034	C2H6NO+;60.044											0.74	0.26
Lab7b	acetone	ketone		Cylinder	C3H7O+;59.049	C3H9O2+;77.06											0.99	0.01
Lab7b	acrylonitrile	nitrile	alkene	Cylinder	C3H4N+;54.034	C3H6NO+;72.044											0.94	0.06
Lab7b	isoprene	alkene		Cylinder	C5H9+;69.07			C5H8+;68.062	C5H7+;67.054		C3H3+;39.023	C3H5+;41.039					0.92			0.01	0.02		0.02	0.03
Lab7b	methacrolein	aldehyde	alkene	Cylinder	C4H7O+;71.049	C4H9O2+;89.06											0.98	0.02
Lab7b	2-butanone	ketone		Cylinder	C4H9O+;73.065	C4H11O2+;91.075				C4H7+;55.054							0.94	0.01				0.05
Lab7b	benzene	aromatic		Cylinder	C6H7+;79.054			C6H6+;78.046								C6H7O+;95.049	0.81			0.01								0.18
Lab7b	toluene	aromatic		Cylinder	C7H9+;93.07				C7H7+;91.054							C6H7O+;95.049	0.76				0.13							0.11
Lab7b	chlorobenzene	aromatic	halogen	Cylinder	C6ClH6+;113.02			C6ClH5+;112.01								C6H7O+;95.049	0.71			0.01								0.28
Lab7b	o-xylene	aromatic		Cylinder	C8H11+;107.09				C8H9+;105.07		C7H7+;91.054						0.84				0.03		0.13
Lab7b	1,3,5-trimethylbenzene	aromatic		Cylinder	C9H13+;121.1			C9H12+;120.09	C9H11+;119.09		C8H9+;105.07						0.92			0.01	0.01		0.06
Lab7b	a-pinene	cyclic	alkene	Cylinder	C10H17+;137.13						C6H9+;81.07	C7H11+;95.086					0.5						0.47	0.03
Lab7c	acetaldehyde	aldehyde		Cylinder	C2H5O+;45.033	C2H7O2+;63.044											0.96	0.04
Lab7c	a-pinene	cyclic	alkene	Cylinder	C10H17+;137.13						C6H9+;81.07	C7H11+;95.086	C8H11+;107.09				0.47						0.43	0.04	0.06
Lab7c	acetonitrile	nitrile		Cylinder	C2H4N+;42.034	C2H6NO+;60.044											0.93	0.07
Lab7c	acetone	ketone		Cylinder	C3H7O+;59.049	C3H9O2+;77.06											0.98	0.02
Lab7c	acrylonitrile	nitrile	alkene	Cylinder	C3H4N+;54.034	C3H6NO+;72.044											0.97	0.03
Lab7c	isoprene	alkene		Cylinder	C5H9+;69.07			C5H8+;68.062	C5H7+;67.054		C3H3+;39.023	C3H5+;41.039					0.92			0.02	0.02		0.01	0.03
Lab7c	methacrolein	aldehyde	alkene	Cylinder	C4H7O+;71.049	C4H9O2+;89.06											0.93	0.07
Lab7c	2-butanone	ketone		Cylinder	C4H9O+;73.065	C4H11O2+;91.075											0.93	0.07
Lab7c	benzene	aromatic		Cylinder	C6H7+;79.054			C6H6+;78.046								C6H7O+;95.049	0.81			0.02								0.17
Lab7c	toluene	aromatic		Cylinder	C7H9+;93.07				C7H7+;91.054							C6H7O+;95.049	0.72				0.17							0.11
Lab7c	chlorobenzene	aromatic	halogen	Cylinder	C6ClH6+;113.02			C6ClH5+;112.01								C6H7O+;95.049	0.75			0.03								0.22
Lab7c	o-xylene	aromatic		Cylinder	C8H11+;107.09				C8H9+;105.07		C7H7+;91.054						0.84				0.04		0.12
Lab7c	1,3,5-trimethylbenzene	aromatic		Cylinder	C9H13+;121.1				C9H11+;119.09		C8H9+;105.07						0.92				0.02		0.06

## Sheet: 2_Lab_ID
ID	IMR Temperature (°C)	IMR Pressure (mbar)	IMR Front (V)	IMR Back (V)	IMR Front - Back (V)	E/N (Td)	IMR RF Voltage (V)	BSQ RF Voltage (V)	Skimmer (V)	BSQ Front (V)	Skimmer - IMR Back (V)	BSQ Front - Skimmer (V)	Water Flowrate (sccm)	Inlet flowrate (cm3 min-1)	Date Acquired
Lab1a	60	2	600	20	580	133	450	350	-4	-11.7	-24	-7.7	20	120	2023-05-01
Lab1b	60	2	600	20	580	133	450	300	-4	-11.7	-24	-7.7	20	120	2024-05-01
Lab2a	60	2.4	600	25	575	110	450	300	-4	-11.7	-29	-7.7	19	100	2020-10-01
Lab2b	60	2.4	650	-5	655	124	400	400	-9.4	-17.5	-4.4	-8.1	29	100	2023-11-01
Lab3a	100	1.5	400	35	365	125	400	215	-4.7	-9.3	-39.7	-4.6	20	96	2020-12-01
Lab3b	100	1.5	410	25	385	132	400	215	-7	-11	-32	-4	15	88	2022-11-01
Lab4a	100	2.5	630	36	594	122	450	320	-4.5	-9.5	-40.5	-5	20	79	2023-12-01
Lab4b	100	2.5	630	36	594	122	450	320	-4.5	-9.5	-40.5	-5	20	95	2024-09-01
Lab5	110	2.5	650	26	624	132	400	250	-1	-4.5	-27	-3.5	21	180	2021-07-01
Lab6a	90	1.5	500	20	480	160	400	255	0.9	-5.6	-19.1	-6.5	15	260	2021-05-01
Lab6b	90	1.5	500	20	480	160	400	255	0.9	-5.6	-19.1	-6.5	15	290	2022-05-01
Lab7a	100	2.2	600	30	570	133	450	325	-8.7	-12.9	-38.7	-4.2	20	100	2022-04-01
Lab7b	100	2.2	600	30	570	133	450	325	-8.7	-12.9	-38.7	-4.2	20	100	2022-09-01
Lab7c	100	2.2	600	30	570	133	450	325	-8.7	-12.9	-38.7	-4.2	15	100	2023-05-01

## Sheet: 3_EN_Calculator
E/N calculator		Enter Green Cells
		Calculation in Red Cells
drift tube properties			Notes
length	0.1	m
dV	570	V	IMR Front - Back
E	5700	V/m	Electric field
Pressure and temperature
p	2.2	mbar
T	100	degrees
T	373	k
R	0.083	m3 mbar K-1 mol-1
Nv	4.28005e+22	molecules m-3
Nv	4.28005e+16	molecules cm-3
Td	1e-21		electric field of approximately 2400 V m2 divided by loschmidt constant
EN calculation
E/N	1.33176e-19
E/N	133.176	Td
